# Supplementary material for: Biodiversity of Trichoderma from grassland and forest ecosystems in Northern Xinjiang, China
Source: PubMed Central journal article supplement (PMC7392985; doi:10.1007/s13205-020-02301-6), 2020-07-30
Supplement: 13205_2020_2301_MOESM2_ESM.pdf [file 13205_2020_2301_MOESM2_ESM.pdf]

| Sample  | Altitude | Ecosystem | Longitude  | Latitude   | Region | Species           |
|---------|----------|-----------|------------|------------|--------|-------------------|
| ALBRC1  | 775      | 1         | 87.0508611 | 48.1686667 | 1      | T.brevicomactum   |
| ALBRC2  | 775      | 1         | 87.0508611 | 48.1686667 | 1      | T.brevicomactum   |
| ALBRC3  | 775      | 1         | 87.0508611 | 48.1686667 | 1      | T.gamsii          |
| ALBRC4  | 775      | 1         | 87.0508611 | 48.1686667 | 1      | T.harzianum       |
| ALBRC5  | 775      | 1         | 87.0508611 | 48.1686667 | 1      | T.harzianum       |
| ALBRC6  | 1204     | 1         | 87.0211389 | 48.1896111 | 1      | T.harzianum       |
| ALBRC7  | 1204     | 1         | 87.0211389 | 48.1896111 | 1      | T.harzianum       |
| ALBRC9  | 775      | 1         | 87.0508611 | 48.1686667 | 1      | T.paraviridescens |
| ALBRC10 | 775      | 1         | 87.0508611 | 48.1686667 | 1      | T.rossicum        |
| ALBRC11 | 775      | 1         | 87.0508611 | 48.1686667 | 1      | T.rossicum        |
| ALBRC12 | 775      | 1         | 87.0508611 | 48.1686667 | 1      | T.saturnisporum   |
| AFKK1   | 1207     | 2         | 89.8516667 | 47.2108889 | 1      | T.gamsii          |
| AFKK2   | 1256     | 2         | 89.8707778 | 47.208     | 1      | T.gamsii          |
| AFKK3   | 1258     | 2         | 89.8692222 | 47.2089444 | 1      | T.harzianum       |
| AFKK4   | 1302     | 2         | 89.8741944 | 47.20075   | 1      | T.harzianum       |
| AFKK5   | 1244     | 2         | 89.8688889 | 47.2091944 | 1      | T.asperellum      |
| AFKK6   | 1258     | 2         | 89.8692222 | 47.2089444 | 1      | T.asperellum      |
| AFKK7   | 1258     | 2         | 89.8692222 | 47.2089444 | 1      | T.asperellum      |
| AFKK8   | 1299     | 2         | 89.8738611 | 47.2025556 | 1      | T.asperellum      |
| AFKK9   | 1302     | 2         | 89.8741944 | 47.20075   | 1      | T.asperellum      |
| AFKK10  | 1207     | 2         | 89.8516667 | 47.2108889 | 1      | T.harzianum       |
| AFKK11  | 1218     | 2         | 89.8604444 | 47.2073611 | 1      | T.harzianum       |
| AFKK12  | 1218     | 2         | 89.8604444 | 47.2073611 | 1      | T.harzianum       |
| AFKK13  | 1210     | 2         | 89.8607778 | 47.2076667 | 1      | T.harzianum       |
| AFKK14  | 1210     | 2         | 89.8607778 | 47.2076667 | 1      | T.harzianum       |
| AFKK15  | 1244     | 2         | 89.8688889 | 47.2091944 | 1      | T.harzianum       |
| AFKK16  | 1256     | 2         | 89.8707778 | 47.208     | 1      | T.harzianum       |
| AFKK17  | 1256     | 2         | 89.8707778 | 47.208     | 1      | T.harzianum       |
| AFKK18  | 1299     | 2         | 89.8738611 | 47.2025556 | 1      | T.harzianum       |
| AFKK19  | 1299     | 2         | 89.8738611 | 47.2025556 | 1      | T.harzianum       |
| AFKK20  | 1299     | 2         | 89.8738611 | 47.2025556 | 1      | T.harzianum       |
| AFKK21  | 1302     | 2         | 89.8741944 | 47.20075   | 1      | T.harzianum       |
| AFKK25  | 1210     | 2         | 89.8607778 | 47.2076667 | 1      | T.saturnisporum   |
| AFKK26  | 1210     | 2         | 89.8607778 | 47.2076667 | 1      | T.saturnisporum   |
| AFKK27  | 1404     | 3         | 89.8764167 | 47.1956389 | 1      | T.asperellum      |
| AFKK28  | 1392     | 3         | 89.8763889 | 47.1958333 | 1      | T.harzianum       |
| AFKK29  | 1380     | 3         | 89.8763611 | 47.1957778 | 1      | T.harzianum       |
| AFKK30  | 1404     | 3         | 89.8764167 | 47.1956389 | 1      | T.harzianum       |
| AFKK31  | 1408     | 3         | 89.8764167 | 47.1956389 | 1      | T.harzianum       |
| AFKK32  | 1401     | 3         | 89.8761944 | 47.1955833 | 1      | T.harzianum       |
| AFKK33  | 1370     | 3         | 89.8761389 | 47.1955556 | 1      | T.harzianum       |
| AFKK34  | 1404     | 3         | 89.8764167 | 47.1956389 | 1      | T.paraviridescens |

|          |      |   |            |            |   |                   |
|----------|------|---|------------|------------|---|-------------------|
| AFKK35   | 1408 | 3 | 89.8764167 | 47.1956389 | 1 | T.paraviridescens |
| AFKK36   | 1401 | 3 | 89.8761944 | 47.1955833 | 1 | T.paraviridescens |
| AFKK37   | 1370 | 3 | 89.8761389 | 47.1955556 | 1 | T.paraviridescens |
| AFKK39   | 1370 | 3 | 89.8761389 | 47.1955556 | 1 | T.rossicum        |
| AFKK40   | 1379 | 3 | 89.87675   | 47.1961667 | 1 | T.paraviridescens |
| AFKK41   | 1404 | 3 | 89.8764167 | 47.1956389 | 1 | T.paraviridescens |
| AFKK42   | 1443 | 3 | 89.8761944 | 47.1955833 | 1 | T.paraviridescens |
| ALKNS1   | 1365 | 2 | 87.0515278 | 48.6198611 | 1 | T.asperellum      |
| ALKNS2   | 1361 | 2 | 87.0516944 | 48.6194722 | 1 | T.asperellum      |
| ALKNS3   | 1367 | 2 | 87.0519444 | 48.6194167 | 1 | T.asperellum      |
| ALKNS4   | 1386 | 2 | 87.02475   | 48.7086667 | 1 | T.asperellum      |
| ALKNS5   | 1363 | 2 | 87.0268611 | 48.7149722 | 1 | T.asperellum      |
| ALKNS6   | 1365 | 2 | 87.0515278 | 48.6198611 | 1 | T.harzianum       |
| ALKNS7   | 1365 | 2 | 87.0515278 | 48.6198611 | 1 | T.harzianum       |
| ALKNS8   | 1365 | 2 | 87.0515278 | 48.6198611 | 1 | T.harzianum       |
| ALKNS9   | 1361 | 2 | 87.0516944 | 48.6194722 | 1 | T.harzianum       |
| ALKNS10  | 1367 | 2 | 87.0519444 | 48.6194167 | 1 | T.harzianum       |
| ALKNS11  | 1386 | 2 | 87.02475   | 48.7086667 | 1 | T.harzianum       |
| ALKNS12  | 1384 | 2 | 87.0270833 | 48.71175   | 1 | T.harzianum       |
| ALKNS13  | 1384 | 2 | 87.0270833 | 48.71175   | 1 | T.harzianum       |
| ALKNS14  | 1391 | 2 | 87.0300833 | 48.7148333 | 1 | T.harzianum       |
| ALKNS15  | 1402 | 2 | 87.0317778 | 48.7145833 | 1 | T.harzianum       |
| ALKNS16  | 1408 | 2 | 87.0340833 | 48.7111389 | 1 | T.harzianum       |
| ALKNS17  | 1407 | 2 | 87.0342222 | 48.7100833 | 1 | T.harzianum       |
| ALKNS18  | 1367 | 2 | 87.0519444 | 48.6194167 | 1 | T.harzianum       |
| ALKNS19  | 1384 | 2 | 87.0270833 | 48.71175   | 1 | T.paraviridescens |
| ALKNS20  | 1391 | 2 | 87.0300833 | 48.7148333 | 1 | T.paraviridescens |
| ALKNS21  | 1367 | 2 | 87.0519444 | 48.6194167 | 1 | T.paraviridescens |
| ALKNS22  | 1407 | 2 | 87.0342222 | 48.7100833 | 1 | T.paraviridescens |
| ALKNS23  | 1363 | 2 | 87.0268611 | 48.7149722 | 1 | T.paraviridescens |
| ALKNS24  | 1367 | 2 | 87.0519444 | 48.6194167 | 1 | T.rossicum        |
| ALKNS100 | 1398 | 4 | 87.0277778 | 48.7135833 | 1 | T.polysporum      |
| ALKNS101 | 1398 | 4 | 87.0277778 | 48.7135833 | 1 | T.polysporum      |
| ALKNS102 | 1398 | 4 | 87.0277778 | 48.7135833 | 1 | T.polysporum      |
| ALKNS103 | 1374 | 4 | 87.0269167 | 48.7028611 | 1 | T.polysporum      |
| ALKNS104 | 1370 | 4 | 87.027     | 48.70325   | 1 | T.polysporum      |
| ALKNS105 | 1350 | 4 | 87.0511944 | 48.6198056 | 1 | T.rossicum        |
| ALKNS106 | 1331 | 4 | 87.0503611 | 48.6185556 | 1 | T.rossicum        |
| ALKNS27  | 1400 | 4 | 87.0243611 | 48.7097222 | 1 | T.citrinoviride   |
| ALKNS28  | 1374 | 4 | 87.0223889 | 48.7121111 | 1 | T.citrinoviride   |
| ALKNS29  | 1376 | 4 | 87.0261111 | 48.7060556 | 1 | T.citrinoviride   |
| ALKNS30  | 1399 | 4 | 87.0243611 | 48.7097222 | 1 | T.citrinoviride   |
| ALKNS31  | 1373 | 4 | 87.0258056 | 48.7059167 | 1 | T.citrinoviride   |
| ALKNS32  | 1399 | 4 | 87.0243611 | 48.7097222 | 1 | T.saturnisporum   |
| ALKNS33  | 1383 | 4 | 87.0224444 | 48.7098333 | 1 | T.viridescens     |

|         |      |   |            |            |   |                   |
|---------|------|---|------------|------------|---|-------------------|
| ALKNS34 | 1331 | 4 | 87.0503611 | 48.6185556 | 1 | T.asperellum      |
| ALKNS35 | 1331 | 4 | 87.0503611 | 48.6185556 | 1 | T.asperellum      |
| ALKNS36 | 1375 | 4 | 87.0250556 | 48.7139722 | 1 | T.asperellum      |
| ALKNS37 | 1331 | 4 | 87.0503611 | 48.6185556 | 1 | T.citrinoviride   |
| ALKNS38 | 1375 | 4 | 87.0250556 | 48.7139722 | 1 | T.citrinoviride   |
| ALKNS39 | 1375 | 4 | 87.0250556 | 48.7139722 | 1 | T.citrinoviride   |
| ALKNS40 | 1375 | 4 | 87.0250556 | 48.7139722 | 1 | T.citrinoviride   |
| ALKNS41 | 1404 | 4 | 87.0348889 | 48.7094167 | 1 | T.citrinoviride   |
| ALKNS42 | 1375 | 4 | 87.0250556 | 48.7139722 | 1 | T.citrinoviride   |
| ALKNS43 | 1350 | 4 | 87.0511944 | 48.6198056 | 1 | T.harzianum       |
| ALKNS44 | 1350 | 4 | 87.0511944 | 48.6198056 | 1 | T.harzianum       |
| ALKNS45 | 1350 | 4 | 87.0511944 | 48.6198056 | 1 | T.harzianum       |
| ALKNS46 | 1343 | 4 | 87.0506389 | 48.6188056 | 1 | T.harzianum       |
| ALKNS47 | 1331 | 4 | 87.0503611 | 48.6185556 | 1 | T.harzianum       |
| ALKNS48 | 1319 | 4 | 87.0497778 | 48.6184167 | 1 | T.harzianum       |
| ALKNS49 | 1393 | 4 | 87.0260833 | 48.7098611 | 1 | T.harzianum       |
| ALKNS50 | 1393 | 4 | 87.0260833 | 48.7098611 | 1 | T.harzianum       |
| ALKNS51 | 1393 | 4 | 87.0269444 | 48.7130556 | 1 | T.harzianum       |
| ALKNS52 | 1412 | 4 | 87.0340278 | 48.7114444 | 1 | T.harzianum       |
| ALKNS53 | 1384 | 4 | 87.0275556 | 48.71175   | 1 | T.harzianum       |
| ALKNS54 | 1393 | 4 | 87.0269444 | 48.7130556 | 1 | T.harzianum       |
| ALKNS55 | 1411 | 4 | 87.0336111 | 48.7129167 | 1 | T.harzianum       |
| ALKNS56 | 1412 | 4 | 87.0340278 | 48.7114444 | 1 | T.harzianum       |
| ALKNS57 | 1375 | 4 | 87.0250556 | 48.7139722 | 1 | T.harzianum       |
| ALKNS58 | 1404 | 4 | 87.0348889 | 48.7094167 | 1 | T.harzianum       |
| ALKNS59 | 1368 | 4 | 87.0268889 | 48.7036111 | 1 | T.oblongisporum   |
| ALKNS60 | 1368 | 4 | 87.0268889 | 48.7036111 | 1 | T.oblongisporum   |
| ALKNS61 | 1368 | 4 | 87.0268889 | 48.7036111 | 1 | T.oblongisporum   |
| ALKNS62 | 1368 | 4 | 87.0268889 | 48.7036111 | 1 | T.oblongisporum   |
| ALKNS63 | 1368 | 4 | 87.0273333 | 48.7016667 | 1 | T.oblongisporum   |
| ALKNS64 | 1368 | 4 | 87.0268889 | 48.7036111 | 1 | T.oblongisporum   |
| ALKNS65 | 1368 | 4 | 87.0268889 | 48.7036111 | 1 | T.oblongisporum   |
| ALKNS66 | 1382 | 4 | 87.0263889 | 48.7145278 | 1 | T.oblongisporum   |
| ALKNS67 | 1382 | 4 | 87.0263889 | 48.7145278 | 1 | T.oblongisporum   |
| ALKNS68 | 1386 | 4 | 87.0339444 | 48.6949722 | 1 | T.pararogersonii  |
| ALKNS69 | 1350 | 4 | 87.0511944 | 48.6198056 | 1 | T.paraviridescens |
| ALKNS70 | 1331 | 4 | 87.0503611 | 48.6185556 | 1 | T.paraviridescens |
| ALKNS71 | 1331 | 4 | 87.0503611 | 48.6185556 | 1 | T.paraviridescens |
| ALKNS72 | 1319 | 4 | 87.0497778 | 48.6184167 | 1 | T.paraviridescens |
| ALKNS73 | 1393 | 4 | 87.0260833 | 48.7098611 | 1 | T.paraviridescens |
| ALKNS74 | 1393 | 4 | 87.0269444 | 48.7130556 | 1 | T.paraviridescens |
| ALKNS75 | 1389 | 4 | 87.0283333 | 48.7135    | 1 | T.paraviridescens |
| ALKNS76 | 1412 | 4 | 87.0340278 | 48.7114444 | 1 | T.paraviridescens |
| ALKNS77 | 1405 | 4 | 87.0356111 | 48.7084444 | 1 | T.paraviridescens |
| ALKNS78 | 1405 | 4 | 87.0356111 | 48.7084444 | 1 | T.paraviridescens |

|         |      |   |            |            |   |                   |
|---------|------|---|------------|------------|---|-------------------|
| ALKNS79 | 1405 | 4 | 87.0354722 | 48.7065833 | 1 | T.paraviridescens |
| ALKNS80 | 1386 | 4 | 87.0339444 | 48.6949722 | 1 | T.paraviridescens |
| ALKNS81 | 1363 | 4 | 87.0283889 | 48.7003611 | 1 | T.paraviridescens |
| ALKNS82 | 1368 | 4 | 87.0273333 | 48.7016667 | 1 | T.paraviridescens |
| ALKNS83 | 1370 | 4 | 87.027     | 48.70325   | 1 | T.paraviridescens |
| ALKNS84 | 1370 | 4 | 87.027     | 48.70325   | 1 | T.paraviridescens |
| ALKNS85 | 1343 | 4 | 87.0506389 | 48.6188056 | 1 | T.paraviridescens |
| ALKNS86 | 1393 | 4 | 87.0260833 | 48.7098611 | 1 | T.paraviridescens |
| ALKNS87 | 1393 | 4 | 87.0260833 | 48.7098611 | 1 | T.paraviridescens |
| ALKNS88 | 1394 | 4 | 87.0258889 | 48.7100278 | 1 | T.paraviridescens |
| ALKNS89 | 1384 | 4 | 87.0275556 | 48.71175   | 1 | T.paraviridescens |
| ALKNS90 | 1393 | 4 | 87.0269444 | 48.7130556 | 1 | T.paraviridescens |
| ALKNS91 | 1393 | 4 | 87.0269444 | 48.7130556 | 1 | T.paraviridescens |
| ALKNS92 | 1398 | 4 | 87.0277778 | 48.7135833 | 1 | T.piluliferum     |
| ALFY1   | 1405 | 1 | 89.7280833 | 46.9803889 | 1 | T.harzianum       |
| ALFY2   | 1277 | 1 | 89.7869444 | 47.1883056 | 1 | T.asperellum      |
| ALFY3   | 1183 | 1 | 89.8079444 | 47.2942222 | 1 | T.asperellum      |
| ALFY4   | 1405 | 1 | 89.7280833 | 46.9803889 | 1 | T.harzianum       |
| ALFY5   | 1403 | 1 | 89.7275278 | 46.9805278 | 1 | T.harzianum       |
| ALFY6   | 1277 | 1 | 89.7869444 | 47.1883056 | 1 | T.longibrachiatum |
| ALFY7   | 968  | 1 | 89.521     | 45.6664444 | 1 | T.asperellum      |
| ALFY8   | 968  | 1 | 89.521     | 45.6664444 | 1 | T.citrinoviride   |
| ALFY10  | 987  | 1 | 89.5065    | 45.5326389 | 1 | T.harzianum       |
| AKTB1   | 1585 | 2 | 87.2103889 | 48.3576389 | 1 | T.caerulescens    |
| AKTB2   | 1508 | 2 | 87.1106111 | 48.3200556 | 1 | T.polysporum      |
| AKTB8   | 1273 | 3 | 86.5900278 | 47.0581389 | 1 | T.paraviridescens |
| AKTB9   | 1273 | 3 | 86.5900278 | 47.0581389 | 1 | T.rossicum        |
| BZZY1   | 2705 | 2 | 84.3615556 | 43.1489722 | 4 | T.polysporum      |
| BZZY2   | 2482 | 2 | 84.1959722 | 43.0456667 | 4 | T.harzianum       |
| BZZY3   | 2482 | 2 | 84.1959722 | 43.0456667 | 4 | T.harzianum       |
| BZZY4   | 2469 | 2 | 84.2458889 | 43.0571944 | 4 | T.harzianum       |
| BZZY5   | 2705 | 2 | 84.3615556 | 43.1489722 | 4 | T.paraviridescens |
| CJTC1   | 1910 | 2 | 87.1716944 | 43.2702778 | 3 | T.harzianum       |
| CJTC2   | 1922 | 2 | 88.1178056 | 43.8983889 | 3 | T.harzianum       |
| CJTC3   | 1922 | 2 | 88.1178056 | 43.8983889 | 3 | T.longibrachiatum |
| CJTC4   | 1271 | 2 | 88.0343611 | 43.9678611 | 3 | T.paraviridescens |
| CJTC5   | 1271 | 2 | 88.0343056 | 43.9678056 | 3 | T.rossicum        |
| CJTC6   | 1271 | 2 | 88.0343611 | 43.9678611 | 3 | T.rossicum        |
| CJTC30  | 1924 | 3 | 88.1175833 | 43.8983056 | 3 | T.citrinoviride   |
| CJTC31  | 1271 | 3 | 88.0343056 | 43.9678056 | 3 | T.harzianum       |
| CJTC32  | 1925 | 3 | 88.1200278 | 43.8985556 | 3 | T.rossicum        |
| CJTC33  | 1924 | 3 | 88.1175833 | 43.8983056 | 3 | T.atroviride      |
| CJTC34  | 1918 | 3 | 88.1134444 | 43.8993611 | 3 | T.paraviridescens |
| CJTC35  | 1931 | 3 | 88.1161667 | 43.8996944 | 3 | T.paraviridescens |
| CJTC36  | 1918 | 3 | 88.1134444 | 43.8993611 | 3 | T.polysporum      |

|         |      |   |            |            |   |                   |
|---------|------|---|------------|------------|---|-------------------|
| YNTB1   | 2211 | 2 | 84.3467222 | 43.2051111 | 2 | T.oblongisporum   |
| YNTB2   | 2453 | 2 | 84.3348889 | 43.1822778 | 2 | T.oblongisporum   |
| YNTB3   | 2211 | 2 | 84.3467222 | 43.2051111 | 2 | T.oblongisporum   |
| YNTB4   | 2211 | 2 | 84.3467222 | 43.2051111 | 2 | T.oblongisporum   |
| YNTB5   | 2211 | 2 | 84.3467222 | 43.2051111 | 2 | T.polysporum      |
| ALKNS93 | 1393 | 4 | 87.0269444 | 48.7130556 | 1 | T.polysporum      |
| YNTB7   | 2100 | 3 | 84.33075   | 43.2075833 | 2 | T.oblongisporum   |
| YNTB8   | 2154 | 3 | 84.3353611 | 43.2058056 | 2 | T.paraviridescens |
| YNTB9   | 2039 | 3 | 84.3286389 | 43.2189167 | 2 | T.paraviridescens |
| YNTB10  | 2100 | 3 | 84.33075   | 43.2075833 | 2 | T.polysporum      |
| ALKNS94 | 1374 | 4 | 87.0269167 | 48.7028611 | 1 | T.polysporum      |
| YNTB12  | 1922 | 3 | 84.3109167 | 43.2128333 | 2 | T.paraviridescens |
| YNTB13  | 1872 | 3 | 84.3158333 | 43.2211111 | 2 | T.polysporum      |
| YNTB14  | 1872 | 3 | 84.3158333 | 43.2211111 | 2 | T.semiorbis       |
| YNTQ1   | 2330 | 2 | 84.3535278 | 43.65125   | 2 | T.oblongisporum   |
| YNTQ2   | 2401 | 3 | 84.3313333 | 43.5939722 | 2 | T.citrinoviride   |
| YNTQ3   | 2481 | 3 | 84.3506389 | 43.5705556 | 2 | T.oblongisporum   |
| YNTQ4   | 2260 | 3 | 84.3821667 | 43.3731111 | 2 | T.paraviridescens |
| YNTQ5   | 1825 | 3 | 84.3559444 | 43.3314167 | 2 | T.asperellum      |
| YNTQ6   | 2401 | 3 | 84.3313333 | 43.5939722 | 2 | T.citrinoviride   |
| YNTQ7   | 1825 | 3 | 84.3559444 | 43.3314167 | 2 | T.polysporum      |
| YQRM1   | 3205 | 2 | 84.4264167 | 43.7480556 | 2 | T.oblongisporum   |
| YQRM2   | 2517 | 2 | 84.4377222 | 43.6663056 | 2 | T.paraviridescens |
| YQRM3   | 3076 | 2 | 84.4332778 | 43.5041111 | 2 | T.polysporum      |
| YQRM4   | 3076 | 2 | 84.4332778 | 43.5041111 | 2 | T.polysporum      |
| YQRM5   | 2806 | 2 | 84.4674722 | 43.5104722 | 2 | T.polysporum      |
| YQRM6   | 2689 | 2 | 84.4111944 | 43.6783889 | 2 | T.polysporum      |
| ALBRK1  | 791  | 1 | 87.0448889 | 48.1720556 | 1 | T.harzianum       |
| AFKK22  | 1190 | 2 | 89.7564722 | 47.1114722 | 1 | T.harzianum       |
| AFKK23  | 1190 | 2 | 89.7564722 | 47.1114722 | 1 | T.harzianum       |
| AFKK24  | 1260 | 2 | 89.7883889 | 47.1869444 | 1 | T.harzianum       |
| ALKNS26 | 2001 | 2 | 87.2061111 | 48.4327778 | 1 | T.ghanense        |
| ALKNS95 | 1368 | 4 | 87.0268889 | 48.7036111 | 1 | T.polysporum      |
| ALKNS96 | 1368 | 4 | 87.0268889 | 48.7036111 | 1 | T.polysporum      |
| ALKNS97 | 1363 | 4 | 87.0268611 | 48.7149722 | 1 | T.polysporum      |
| ALKNS98 | 1363 | 4 | 87.0268611 | 48.7149722 | 1 | T.polysporum      |
| ALKNS99 | 1393 | 4 | 87.0260833 | 48.7098611 | 1 | T.polysporum      |
| YNTB11  | 2197 | 4 | 84.3446111 | 43.2034722 | 2 | T.polysporum      |
| ALFY9   | 1161 | 1 | 89.486417  | 45.2833333 | 1 | T.harzianum       |
| AKTB3   | 1495 | 2 | 87.1098889 | 48.3203056 | 1 | T.afroharzianum   |
| AKTB5   | 1797 | 2 | 87.1596944 | 48.4628611 | 1 | T.harzianum       |
| AKTB6   | 1797 | 2 | 87.1596944 | 48.4628611 | 1 | T.harzianum       |
| AKTB10  | 1590 | 2 | 87.1236111 | 48.3322222 | 1 | T.viridescens     |
| AKTB11  | 696  | 1 | 86.91475   | 47.58975   | 1 | T.longibrachiatum |
| BZHSA1  | 1009 | 1 | 86.0890833 | 46.6871111 | 4 | T.harzianum       |

|         |        |   |            |            |   |                   |
|---------|--------|---|------------|------------|---|-------------------|
| BZHSB1  | 1227   | 1 | 86.348     | 46.8732222 | 4 | T.ghanense        |
| BZHSB2  | 1227   | 1 | 86.348     | 46.8732222 | 4 | T.harzianum       |
| WLXG6   | 1929.4 | 3 | 87.3900986 | 43.3875733 | 3 | T.saturnisporum   |
| CJTC11  | 2017   | 2 | 88.1166667 | 43.8833333 | 3 | T.afroharzianum   |
| CJTC21  | 2015   | 3 | 88.1166667 | 43.8833333 | 3 | T.afroharzianum   |
| CJTC22  | 1972   | 3 | 88.1166667 | 43.8833333 | 3 | T.afroharzianum   |
| CJTC23  | 1973   | 3 | 88.1166667 | 43.8833333 | 3 | T.afroharzianum   |
| CJTC24  | 2017   | 2 | 88.1166667 | 43.8833333 | 3 | T.afroharzianum   |
| BZHS2   | 1570   | 2 | 86.5       | 42.6       | 4 | T.harzianum       |
| YLZSB1  | 1575   | 2 | 81.4666667 | 43.15      | 2 | T.harzianum       |
| CJTC8   | 2001   | 2 | 88.1166667 | 43.8833333 | 3 | T.afroharzianum   |
| CJTC19  | 2001   | 2 | 88.1166667 | 43.8833333 | 3 | T.semiorbis       |
| CJTC29  | 1972   | 3 | 88.1166667 | 43.8833333 | 3 | T.semiorbis       |
| ALKNS25 | 1381   | 4 | 87.0225278 | 48.7125556 | 1 | T.citrinoviride   |
| YNTB6   | 2197   | 4 | 84.3446111 | 43.2034722 | 2 | T.fertile         |
| AKTB4   | 1492   | 2 | 87.1100556 | 48.3215833 | 1 | T.gamsii          |
| AKTB7   | 1495   | 2 | 87.1098889 | 48.3203056 | 1 | T.harzianum       |
| BZHSA2  | 1009   | 1 | 86.0890833 | 46.6871111 | 4 | T.saturnisporum   |
| BZHJ1   | 2039   | 2 | 86.3495278 | 42.8743056 | 4 | T.harzianum       |
| BZHJ2   | 2821   | 2 | 86.7025278 | 42.9676667 | 4 | T.koningii        |
| CJTC17  | 2001   | 2 | 88.1166667 | 43.8833333 | 3 | T.rossicum        |
| CJTC28  | 1972   | 3 | 88.1166667 | 43.8833333 | 3 | T.rossicum        |
| WLXG1   | 1928   | 2 | 87.39025   | 43.3985    | 3 | T.harzianum       |
| WLXG2   | 1928   | 2 | 87.39025   | 43.3985    | 3 | T.harzianum       |
| WLXG3   | 1982   | 2 | 87.3853056 | 43.3904444 | 3 | T.pleurotum       |
| WLXG4   | 1968   | 3 | 87.3888611 | 43.3563611 | 3 | T.harzianum       |
| WLXG5   | 1972   | 3 | 87.389     | 43.3564722 | 3 | T.pleurotum       |
| YLCC1   | 1430   | 2 | 81.1416389 | 43.5334167 | 2 | T.atroviride      |
| YLCC2   | 1198   | 2 | 81.1526389 | 43.6103056 | 2 | T.gamsii          |
| YLCC3   | 1430   | 2 | 81.1416389 | 43.5334167 | 2 | T.harzianum       |
| YLCC4   | 2117   | 2 | 81.1113611 | 43.47025   | 2 | T.viridescens     |
| YLCC5   | 2100   | 2 | 81.1113333 | 43.4706389 | 2 | T.viridescens     |
| YLCC6   | 999    | 1 | 81.1621389 | 43.6453056 | 2 | T.harzianum       |
| YLGL1   | 867    | 1 | 82.5220833 | 43.4306944 | 2 | T.harzianum       |
| YLGL2   | 867    | 1 | 82.5220833 | 43.4306944 | 2 | T.harzianum       |
| YLGL3   | 862    | 1 | 82.5221944 | 43.4309722 | 2 | T.harzianum       |
| YLSH1   | 2102   | 2 | 81.3886944 | 44.602     | 2 | T.harzianum       |
| YLSH2   | 2100   | 2 | 81.3880833 | 44.6018889 | 2 | T.harzianum       |
| YLSH3   | 2109   | 2 | 81.3898611 | 44.5996944 | 2 | T.koningii        |
| YLSH4   | 2109   | 2 | 81.3898611 | 44.5996944 | 2 | T.longibrachiatum |
| YLTK1   | 1625   | 2 | 81.8525278 | 43.3550278 | 2 | T.koningii        |
| YLTK2   | 1549   | 2 | 82.0105556 | 43.0985833 | 2 | T.rossicum        |
| YLNLT1  | 1661   | 2 | 84.2889444 | 43.2696111 | 2 | T.hamatum         |
| YLNLT2  | 1663   | 2 | 84.2890556 | 43.2699444 | 2 | T.viridescens     |
| YLZSA1  | 1755   | 2 | 81.3014444 | 43.1423056 | 2 | T.atroviride      |

|        |      |   |            |            |   |                   |
|--------|------|---|------------|------------|---|-------------------|
| YLZSA2 | 2161 | 3 | 81.1103611 | 43.4696944 | 2 | T.viridescens     |
| CJTC12 | 2034 | 2 | 88.1166667 | 43.8833333 | 3 | T.afroharzianum   |
| CJTC13 | 2006 | 2 | 88.1166667 | 43.8833333 | 3 | T.harzianum       |
| BZHS3  | 1570 | 2 | 86.5       | 42.6       | 4 | T.longibrachiatum |
| CJTC16 | 2034 | 2 | 88.1166667 | 43.8833333 | 3 | T.longibrachiatum |
| WLDB2  | 1736 | 2 | 87.2333333 | 43.4333333 | 3 | T.longibrachiatum |
| WLDB3  | 2122 | 2 | 87.2666667 | 43.4       | 3 | T.longibrachiatum |
| WLXB4  | 2051 | 2 | 87.1666667 | 43.4166667 | 3 | T.longibrachiatum |
| WLXB12 | 2044 | 2 | 87.1666667 | 43.4333333 | 3 | T.longibrachiatum |
| CJTC26 | 1972 | 3 | 88.1166667 | 43.8833333 | 3 | T.longibrachiatum |
| WLDB6  | 1916 | 3 | 87.25      | 43.4       | 3 | T.afroharzianum   |
| WLXB2  | 2051 | 2 | 87.1666667 | 43.4166667 | 3 | T.afroharzianum   |
| WLXB5  | 2065 | 2 | 87.1666667 | 43.4166667 | 3 | T.longibrachiatum |
| WLXB6  | 2056 | 2 | 87.1666667 | 43.4166667 | 3 | T.longibrachiatum |
| WLXB10 | 2074 | 2 | 87.1666667 | 43.4166667 | 3 | T.longibrachiatum |
| WLXB13 | 2047 | 2 | 87.1666667 | 43.4333333 | 3 | T.longibrachiatum |
| WLDB1  | 2068 | 2 | 87.2666667 | 43.4       | 3 | T.afroharzianum   |
| WLDB5  | 2042 | 3 | 87.2666667 | 43.4166667 | 3 | T.afroharzianum   |
| WLDB7  | 2089 | 3 | 87.2666667 | 43.4       | 3 | T.longibrachiatum |
| WLXB11 | 2074 | 2 | 87.1666667 | 43.4166667 | 3 | T.longibrachiatum |
| YLZSB2 | 1567 | 2 | 81.4666667 | 43.15      | 2 | T.longibrachiatum |
| BZHS1  | 1570 | 2 | 86.5       | 42.6       | 4 | T.asperellum      |
| CJTC10 | 2016 | 2 | 88.1166667 | 43.8833333 | 3 | T.afroharzianum   |
| CJTC14 | 2016 | 2 | 88.1166667 | 43.8833333 | 3 | T.longibrachiatum |
| CJTC20 | 1972 | 3 | 88.1166667 | 43.8833333 | 3 | T.afroharzianum   |
| CJTC25 | 2015 | 3 | 88.1166667 | 43.8833333 | 3 | T.asperellum      |
| CJTC27 | 2015 | 3 | 88.1166667 | 43.8833333 | 3 | T.longibrachiatum |
| WLDB4  | 1736 | 2 | 87.2333333 | 43.4333333 | 3 | T.viridescens     |
| WLDB8  | 2204 | 3 | 87.2666667 | 43.4       | 3 | T.longibrachiatum |
| WLXB3  | 2074 | 2 | 87.1666667 | 43.4166667 | 3 | T.afroharzianum   |
| WLXB7  | 2047 | 2 | 87.1666667 | 43.4333333 | 3 | T.longibrachiatum |
| WLXB9  | 2060 | 2 | 87.1666667 | 43.4166667 | 3 | T.longibrachiatum |
| ALBRC8 | 775  | 1 | 87.0508611 | 48.1686667 | 1 | T.harzianum       |
| AFKK38 | 1370 | 3 | 89.8761389 | 47.1955556 | 1 | T.rossicum        |
| CJTC7  | 1974 | 2 | 88.1166667 | 43.8833333 | 3 | T.afroharzianum   |
| CJTC9  | 2006 | 2 | 88.1166667 | 43.8833333 | 3 | T.afroharzianum   |
| CJTC15 | 2016 | 2 | 88.1166667 | 43.8833333 | 3 | T.longibrachiatum |
| CJTC18 | 2006 | 2 | 88.1166667 | 43.8833333 | 3 | T.semiorbis       |
| WLDB9  | 2081 | 3 | 87.2666667 | 43.4       | 3 | T.afroharzianum   |
| WLDB10 | 2027 | 3 | 87.2666667 | 43.4166667 | 3 | T.afroharzianum   |
| WLDB11 | 2150 | 3 | 87.2666667 | 43.4       | 3 | T.longibrachiatum |
| WLXB1  | 2060 | 2 | 87.1666667 | 43.4166667 | 3 | T.afroharzianum   |
| WLXB8  | 2070 | 2 | 87.1666667 | 43.4333333 | 3 | T.longibrachiatum |
| WLXB14 | 2069 | 2 | 87.1666667 | 43.4333333 | 3 | T.longibrachiatum |
| WLXG7  | 1982 | 2 | 87.3852778 | 43.3902778 | 3 | T.pleurotum       |

| <b>Ecosystem group</b>                      | <b>Word color for the isolates from different collection region</b> |
|---------------------------------------------|---------------------------------------------------------------------|
| 1. desert steppe                            | 1. Altay                                                            |
|                                             |                                                                     |
| 2. emperate steppe                          | 2. Yili                                                             |
|                                             |                                                                     |
| 3. coniferous forest                        | 3. Changji and Urumuqi                                              |
|                                             |                                                                     |
| 4. coniferous and Broad-leaved Mixed Forest | 4. Bayingolin                                                       |
